# Supplementary material for: Natural Products from Cyanobacteria: Focus on Beneficial Activities
Source: Preprints.org preprint supplement (doi:10.20944/preprints201904.0192.v1), 2019-04-17
Supplement: Supplementary file 3 [file supplementary]

## Sheet: Feuil1
	Supplementary data : Acitivies of the metabolites described
Molecule families	Variants	Chemical classes	Activity	Test targets	Producing organisms	Reference
Abietic acids	Dehydroabietic acid	Terpene	Antibacterial	Synechococcus nidulans	Plectonema radiosum LEGE 06105 Nostoc sp. LEGE 06077 and LEGE 07365 Chroococcidiopsis sp. LEGE 06174 Synechocystis sp. LEGE 06079 Synechocystis salina LEGE 06099 Leptolyngbya ectocarpi LEGE 11425 Nodosilinea sp. LEGE 13457 Nodosilinea nodulosa LEGE 07084	[86]
			No lethality	Artemia salina
			No antialgal	Chlorella vulgaris
Aeruginosins	Aeruginosin 102A-B, 298-A, -B, 98-A, -B, -C, 101, 89-A, -B, 865 Aeruginoside 126A-B	Peptide	Anti-inflammatory activity	AlphaLISA assay	Microcystis aeruginosa NIES-98, NIES-298, NIES-101, NIES-89; Microcystis viridis NIES-102 Planktothrix agardhii CYA 126/8; Nodularia spumigena CCY9414; Nostoc sp. Lukesova 30/93	[61, 310, 311, 315]
			Protease inhibitor	Trypsin Thrombin Plasmin
			No cytotoxicity	HeLa HepG2
Ambigols	Ambigol A-C	Alkaloid	Antialgal	Chlorella fusca	Fischerella ambigua 108b	[132, 133]
			Antibacterial	Bacillus subtilis Bacillus megaterium Mycobacterium tuberculosis
			Antifungal	Penicillium oxalicum Ustilago violacea Microbotryum violaceum
			Antiprotozoal	Trypanosoma cruzi Trypanosoma rhodesiense Plasmodium falciparum
			Lethal activity	Biomphalaria glabrata
			Cytotoxicity	L6 rat myoblasts
			Enzyme inhibition	Cyclooxygenase HIV-1 reverse transcriptase
Anabaenolysins	Anabaenolysin A, B	Lipopeptide	Cytotoxic	Jurkat cells HL-60 NB4 IPC-81 Ewing SHSY-5Y HeLa U87 NRK cells and Primary hepatocytes	Anabaena sp. XPORK 15F; Anabaena sp. XSPORK 27C	[208, 209]
			Antifungal	Candida albicans
			Haemolytic activity
			Ability to permeabilize cell membranes
Aplysiatoxins	Aplysiatoxin Oscillatoxin A Nhantrangin A-B Debromoaplysiatoxin Anhydroaplysiatoxin 3-methoxyaplysiatoxin 3-methoxydebromoaplysiatoxin Neo-debromoaplysiatoxin A-B	Alkaloid	Antiviral	CHIKV (in infected SJCRH30 cells)	Lyngbya majuscula; Schizothrix calcicola; Oscillatoria nigro-viridis; Trichodesmium erythaeum	[50, 167, 169–172]
			Dermatitis and swimmer itch agents
			Cytotoxic	P-388
			Potent tumour-promoting activity
Aurilides	Aurilide B, C Lagunamide A-C Odoamide Palau'amide	Depsipeptide	Cytotoxicity	NCI-H460 neuro-2a KB cells HeLa S3 P388	Lyngbya majuscula; Okeania sp.; Lyngbya sp.	[69, 201–204]
			Lethal activity	Artemia salina
			Anti-swarming	Pseudomonas aeruginosa PA01
			Antiprotozoal	Plasmodium falciparum NF54
			Induce loss of microfilament network
Calcium spirulan	None	Polysaccharide	Antiviral	HIV-1 HSV-1 human cytomegalovirus (HCMV) measles virus mumps virus influenza A virus	Arthrospira platensis	[66, 176, 177]
			Low anticoagulant activity
			No cytotoxicity	HeLa HEL Vero cells MDCK MT-4
Carmaphycins	Carmaphycin A, B	Peptide	Protease inhibition	20S Proteasome	Symploca sp. WHG NAC15/Dec/08–5	[289, 290]
			Cytotoxic	H-460 HCT-116
			Antiprotozoal	Plasmodium falciparum Dd2 Plasmodium berghei Plasmodium falciparum stage V
Carotenoids		Terpenoid	Antioxidant	scavenging ROS (singlet molecular oxygen and peroxyl radical)	All	[55, 332, [333]
			Sunsreens
Chlorophylls		Chlorin	Photosynthesis		All	[56], 332]
			Antioxidant activity	Radicals scavenging
			Pro-oxidant	Sensitizer for singlet oxygen production
Columbamides	Columbamide A-C	Acyl amide	CB1 and CB2 ligands		Moorea bouillonii PNG05-198	[350]
Companeramides	Companeramide A-B	Depsipeptide	Antiprotozoal	Plasmodium falciparum D6 (chloroquine-sensitive) P. falciparum Dd2 P. falciparum 7G8 (both chloroquine-insensitive)	Leptolyngbya sp. or « Hyalidium »	[28]
			No significant cytotoxicity	NCI-H460 MDA-MB-231 SF-295 SK-OV3
Cyanobacterin	None	Lactone derivative	Antialgal	Ankistrodesmus angustus Characium californicum Coelastrum proboscideum Cosmarium botrytis Golenkinia minutissima Haematococcus lacustris Pediastrum biradiatum Selenastrum capricornutum Staurastrum sp. Stigeoclonium pascheri Ulothrix acuminata Porphyridium aerugineum Euglena gracilis	Scytonema hofmanni UTEX 2349; Nostoc linckia CALU 892	[117–119, 128]
			Anticyanobacterial	Synechococcus sp. Anacystis nidulans Microcystis aeruginosa Aphanocapsa sp. Gloeocapsa alpicola Agmenellum quadruplicatum Anabaena cylindrica Anabaena sp. Anabaena flos-aquae Anabaena variablilis Nostoc muscorum Nostoc commune Cylindrospermum maius Tolypothrix tenuis Fremyella diplosiphon Plectonema boryanum Plectonema calothricoides Oscillatoria prolifera Phormidium autumnale Lyngbya kuetzingii …
			Growth inhibition	Lemna gibba Lemna 6746 Lemna minor Pisum sativum Zea mays Rumex crispus Polygonum convolvulus Avena fatua Setaria viridis
Cyanopeptolin-like	A90720A Aeruginopeptin 228-A, 228-B, 917S-A, 917S-B, 917S-C, 95-A, 95-B Anabaenopeptilide 202A, 202B, 90A, 90B Cyanopeptolin 880, 954, 960, A, B, C, D, S, SS, CB071 Hofmannolin Insulapeptolide A-H Jizanpeptin A-E Jizanpeptin E Kempopeptin A-B Kurahamide Largamide D-G Lyngbyastatin 10, 4, 5, 6, 7, 8, 9 Microcystilide A Micropeptin 103, 478-A, 478-B, 88-A, 88-B, 88-C, 88-D, 88-E, 88-F, 90, A, B, DR…	Depsipeptide	Protease inhibitory activity	Chymotrypsin Trypsin Thrombin Elastase Plasmin	Microcystis sp.; Microcystis aeruginosa; Aphanocapsa sp.; Microchaete loktahensis; Planktothrix agardhii; Scytonema hofmanni; Lyngbya sp.; Lyngbya confervoides; Lyngbya spp.; Lyngbya semiplena; Microcystis viridis; Dichothrix utahensis; Nostoc sp.; Nostoc minutum; Planktothrix rubescens; Lyngbya majuscula-Schizothrix sp. (Assemblage); Stigonema sp.; Symploca sp.; Symploca hydnoides; Nostoc insula…	[32, 33, 158, 184, 185, 187, 239–288]
			Other enzyme inhibition	protein phosphatase PP1 tyrosinase carboxypeptidase
			Cytotoxic	H-460 neuro-2a
			Lethal	Thamnocephalus patyurus
			Antibacterial	Escherichia coli Pseudomonas aeruginosa Bacillus subtilis Corynebacterium diphteriae Micrococcus luteus
			Antifungal	Candida albicans
			Antiprotozoal	W2 Plasmodium falciparum
Cyanovirin-N	None	Protein	Antiviral	HIV-1 HIV-2 simian immunodeficiency virus (SIV) feline immunodeficiency virus HHV-6 measles virus	Nostoc ellipsosporum	[173–175]
			Stop fusion and transmission	HIV-1 virus
			No cytotoxicity
Dolastatins	Cemadotine Dolabelide A Dolastatin 10, 13-15 Dolabellin Isodolastatin H Nordolastatin G Somamide A-B Symplostatin 1, 2	Peptide	Antiprotozoal	Plasmodium falciparum	Lyngbya majuscula; Symploca hydnoides; Lyngbya sp.; Symploca sp. VP642; Lyngbya-Schizothrix assemblage	[32, 34, 78, 182–188]
			Lethal	mice
			Cytotoxic	Corbett Assay
Eucapsitrione	None	Anthraquinone derivative	Antibacterial	Mycobacterium tuberculosis (MIC = 3.1 – 6,4 µM)	Eucapsis sp. UTEX 1519	[73]
			No antimicrobial	Candida albicans Escherichia coli Staphylococcus aureus Mycobacterium smegmatis
			Cytotoxic	Vero cells (IC50 >28 µM)
Fischerellins	Ficherellin A-B	Polyketide	Antialgal	Ankistrodesmus falcatus Nannochloris sp. Scenedesmus communis Scenedesmus falcatus Scenedesmus obliquus	Fischerella musicola; Fischerella sp.; Fischerella ambigua; Fischerella tesserantii	[120, 129–131]
			Anticyanobacterial	Synechococcus sp. Anabaena variabilis P9 Anabaena sp. Phormidium sp. Synechocystis sp.
			Antifungal	Uromyces appendiculatus Erysiphe graminis Phytophthora infestans Pyricularia oryzae Monilinia fructigena Pseudocercosporella herpotrichoides
			Lethal	Thamnocephalus platyurus Brachionus calyciflorus
			Growth inhibition	Lemna minor
Grassystatins-Tasiamides	Grassystatin A-F Tasiamide A-F Symplocin A	Depsipeptide	Protease inhibitory activity	Cathepsin D Cathepsin E BACE1	Lyngbya confervoides, Symploca sp., Symploca sp. NHI304, Lyngbya sp. NIH399	[337–343]
			Cytotoxic	KB cells LoVo
			Reduce antigen presentation in dendritic cells
Hapalindole-like	Ambiguine A-Q isonitrile Anhydrohapaloxindole A-B, M Dechlorofontonamide Dechlorohapalindole I Fischambiguine A-B Fischherindole I, L, U Fontonamide Hapalindole A-X Hapalindolinone A-B Hapalonamide G, H, V N-methyl-welwitindolinone B-C Welwitindolinone A-C 12-epi-fischerindole	Alkaloid	Antibacterial	Escherichia coli Mycobacterium tuberculosis Mycobacterium smegmatis Proteus mirabilis Proteus morganii Anabaena doliolum Synechococcus sp. Bacillus subtilis Bacillus cereus Bacillus anthracis Bacillus steareothermophilus Staphylococcus aureus Staphylococcus epidermidis Staphylococcus albus Streptococcus pneumoniae Streptococcus faecium Streptococcus sp. Haemophilus influenzae Klebsiella pneumonia…	Hapalosiphon fontinalis; Westiellopsis sp.; Fischerella musicola; Hapalosiphon welwitschii; Westiella intricata; Fischerella ambigua; Hapalosiphon delicatulus; Hapalosiphon hibernicus; Westiellopsis prolifica; Fischerella sp.; Hapalosiphon laingii	[87–112]
			Antifungal	Candida albicans Apergillus niger Fusarium moniliforme Saccharomyces cerevisiae Aspergillus oryzae Penicillium notatum Trichophyton mentagrophytes Saccharomyces pastorianus Neurospora crassa
			Antialgal	Monoraphidium convolutum
			Cytotoxic	HT-29 MCF-7 NCI-H460 SF268 IMR90 Vero cells Myeloma cells
			Insecticidal	Chironomus riparius
			Lethal activity	Danio rerio embryo
			Inhibit the binding of arginine vasopressin to kidney tissue
			Reverse drug resistance (MDR)	Vinblastine resistant subline SK-VLB of a human ovarian adenocarcinoma line SK-OV-3
			Sodium-channels modulator
Hassallidins	Hassallidin A-E Balticidin A-D	Glycolipopeptide	Antifungal	Candida albicans Candida krusei Cryptococcus albidus Filobasidiella neoformans Aspergillus fumigatus Ustilago maydis Penicillium sp. Fusarium sambucium Candida glabrata Candida maltose Microsporum gypseum Mucor sp. Microsporum canis	Hassalia sp. B02-07; Anabaena sp. (SYKE 748A, 90y1998, 90M3, 299B, 258, SYKE763A, 0TU33S16, 0TU43S8, 1TU33S8, 1TU35S12, 1TU44S9, 1TU44S16, SYKE971/6, NIVA-CYA269/2, NIVA-CYA269/6, XPORK5C, XSPORK7B, XSPORK36B, XSPORK14D, BECID19); Anabaena cylindrica Bio33 Cylindrospermopsis raciborskii (ATC-9502 & CS-505); Aphanizomenon gracile Heaney/Camb 1986 140 1/1; Nostoc sp. (159 & 113.5); Tolypothrix sp. …	[143–147]
			No antibacterial activity	Bacillus subtilis Escherichia coli Streptomyces versicolor Staphylococcus aureus Pseudomonas aeruginosa
Hoshinolactam	None	Lactam	Antiprotozoal	Trypanosoma brucei brucei	Oscillatoria sp.	[181]
			No cytotoxicity	MRC-5
Kulolide-like	Antanapeptin A-D Dudawalamide A-E Hantupeptin A-C Kohamamide A-C Naopopeptin Odobromoamide Pitipeptolide A-F Radamamide A-B Trungapeptin A-C Veraguamide A-J Viequeamide A-F	Depsipeptide	Antibacterial	Mycobacterium tuberculosis	Lyngbya majuscula; Rivularia sp.; Moorea producens; Okeania sp.; Symploca hydnoides; Oscillatoria margaritifera	[25, 74–85]
			No antifungal	Candida albicans Trichophyton mentagrophytes
			Antiprotozoal	Plasmodium falciparum Trypanosoma cruzi Leishamania donovani
			Lethal	Artemia salina
			Cytotoxic	MOLT-4 MCF-7 HT-29 H-460 HeLa
			VGSC (Voltage Gate Sodium Channel) activation	Neuro-2a
Largazole	None	Depsipeptide	Histone deacetylases inhibitor	class I HDACs	Symploca sp.	[298–303]
			Inhibition of the ubiquitin-activating enzyme (E1)
			Cytotoxic	MDA-MB-231 NMuMG U2OS NIH3T3 HT29 IMR-32
			Acts as a pro-drug which release naturally the largazole thiol (the active molecule)
Lyngbyabellins	27-deoxylyngbyabellin Hectochlorin Lyngbyabellin A-N Dolabellin	Depsipeptide	Antifungal	Candida albicans	Lyngbya majuscula Lyngbya sp.; Lyngbya bouillonii Moorea bouillonii	[148–155]
			No antibacterial activity	Escherichia coli Pseudomonas aeruginosa Bacillus subtilis Staphylococcus aureus Salmonella choleraesuis
			Lethal activity	Artemia salina Mice
			Cytotoxic	KB cells LoVo cells NCI-H460 neuro-2a HT-29 HeLa CA46 human Burkitt lymphoma cells NCI cell lines
MAAs		Cyclohexenone linked with an amino acid	Antioxidant	scavenging ROS (singlet molecular oxygen and peroxyl radical)	Synechocystis sp. PCC 6803; Gloeocapsa sp. CU-2556; Aphanothece halophytica; Gloeocapsa sp.; Euhalothece sp.; Microcystis aeruginosa; Arthrospira sp. CU2556; Lyngbya sp. CU2555; Leptolyngbya sp.; Phormidium sp.; Lyngbya cf. aestuarii; Microcoleus chthonoplastes; Microcoleus sp.; Oscillatoria spongelidae; Trichodesmium spp.; Anabaena sp.; Anabaena doliolum; Anabaena variabilis PCC 7937; Nostoc sp.…	[57, 332, 334, 335]
			Sunscreens
Majusculamides	Majusculamide A-D Microcolin A-B Deacetylmicrocolin B Deoxymajusculamide D Desmethoxymajusculamide C	Lipopeptide	Antifungal	Phytophotora infestans Plasmopara viticola	Lyngbya majuscula; Lyngbya polychroa	[159–165]
			Cytotoxic	HCT-116 H-460 MDA-MB-435 Neuro-2a HT-29 IMR-32
			Immunosuppressive activity
			Actin filaments disrupting
			Anti-settlement activity	Barnacle cyprids
Microguanidines	Microguanidine DA368 Microguanidine AL772 Microguanidine KT636	Guanidine derivative	Antifungal	Saccharomyces cerevisiae E4orf4	Microcystis sp. TAU IL-306; Microcystis aeruginosa TAU IL-374	[156–158]
			No cytotoxicity	MCF7 HCT116 A549 PC3 MOLT-4
			No protease inhibition	Chymotrypsin Papain Bovine amino peptidase N Trypsin Thrombin
Phycocyanin		Peptide	Anti-inflammatory	Mouse oedema ear assay	All	[58, 63, 316–318]
			Antioxidant	Ability to scavenge ROS
			Specific inhibitor of COX-2
			No lethality	Mouse
Santacruzamate A	None	Carboxylic acid derived	Histone deacetylases inhibitor	HDAC2 HDAC4 HDAC6	Symploca sp. PAC-19-FEB-10-1	[304]
			Cytotoxic	HuT-78 HCT116
Schizotrin-like	Lyngbyazothrin A-D Pahayokolide A-B Portoamide A-D Schizotrin A Tychonamide A-B	Peptide	Antialgal	Ulothrix sp. Chlamydomonas sp. Chlorella sp. Chlorella vulgaris Ankistrodesmus falcatus Chlamydomonas reinhardtii	Schizothrix sp. TAU IL-82-2; Lyngbya sp. 36.91; Phormidium sp. LEGE 05292; Tychonema sp. CCAP 1462/13	[134–141]
			Antibacterial	Bacillus subtilis Escherichia coli Pseudomonas aeruginosa Serratia marcescens Micrococcus flavus Bacillus megaterium Nostoc sp. Cylindrospermopsis raciborskii
			Antifungal	Saccharomyces cerevisiae Candida albicans Candida tropicalis Rhodotorula rubra Sclerotium rolfsii Rhizoctonia solani Fusarium oxysporum Collectotrichum gloeosporioides
			Antiprotozoal	Trypanosoma b. rhodesiense
			Lethal activity	zebrafish embryos
			Cytotoxicity	H460 A498 SK-OV-3 CEM SK-MEL-28 U251 SKBR3 HT29 MG-63 HCT116 RKO hCMEC/D3 HaCaT
Scytonemin		Alkaloid	Anti-inflammatory	Mouse oedema ear assay	Stigonema sp.; Nostoc punctiforme; Anabaena variabilis; Anabaena ambigua; Aphanocapsa/Synechocystis sp. (assembly); Aulosira fertilissima; Calothrix sp.; Calothrix parietina; Calothrix crustacea; Chlorogloeopsis sp.; Chroococcidiopsis sp.; Chroococcus sp.; Cylindrospermum sp.; Diplocolon sp.; Entophysalis granulos; Gloeocapsa sp.; Hapalosiphon sp.; Hapalosiphon fontinalis; Lyngbya sp.; Lyngbya ae…	[64, 309, 319–322]
			Enzyme inhibition	PLK1 (kinase inhibitory activity) recombinant human protein kinase Cβ2 CDK1/cyclinB GST-Myt1 GST-checkpoint kinase 1
			No cytotoxicity	Human monocytes
Spumigins	Spumigin A, J	Peptide	Proteases inhibitory activity	Trypsin Thrombin Plasmin Cathepsin B	Nodularia spumigena AV1 & CCY 9414; Anabaena compacta NIES-835	[235–237]
Tubercidin	None	Nucleoside	Cytotoxic	KB NIH/3T3 P-388	Tolypothrix byssoidea H-6-2; Scytonema saleyeriense var. indica CV-14-1; Plectonema radiosum DF-6-1; Tolypothrix distorta BL-11-2	[197–199]
			Microtubule stabilizer
Westiellamide-like	Dendroamide A-C Nostocyclamide, M Raocyclamide A-B Tenueclyclamide A-D Westiellamide	Peptide	Antialgal	Navicula minima Nannochloris coccoides	Westiellopsis prolifica EN-3-1; Nostoc sp. 31; Stigonema dendroideum IA-45-3; Oscillatoria raoi TAU IL-76-1-2; Nostoc spongiaeforme var. tenue str. Carmeli	[122–127]
			Anticyanobacterial	Anabaena P-9 Anabaena sp. Synechococcus sp. Synechocystis sp.
			No antifungal	Saccharomyces cerevisiae
			Lethal activity	Biomphalaria glabrata embryos of Paracentrotus lividus
			Cytotoxic	KB LoVo MCF-7/ADR cell lines
